# Supplementary material for: Lytic Bacteriophages against Mutidrug-Resistant Klebsiella pneumoniae: Development of an Effective Phage-based Approach to Combat Multidrug Resistance
Source: Research Square preprint supplement (doi:10.21203/rs.3.rs-850585/v1), 2021-09-07
Supplement: Supplementary file 1 [file 14cd0ad2ef36ab1b3398b834.pdf]

**Figure S1.** Rectangular phylogenetic tree based on proteomic analysis generated by VIPTree.

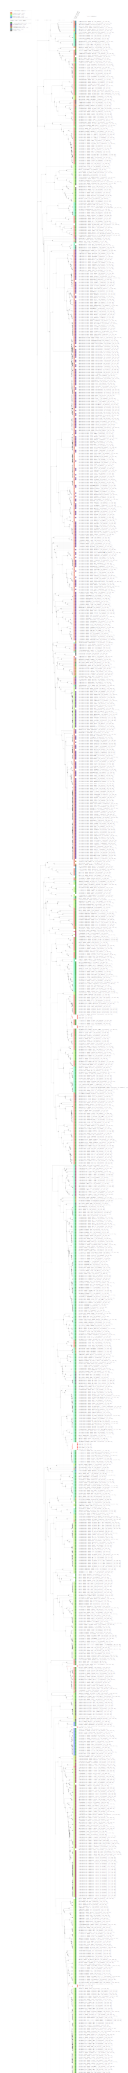

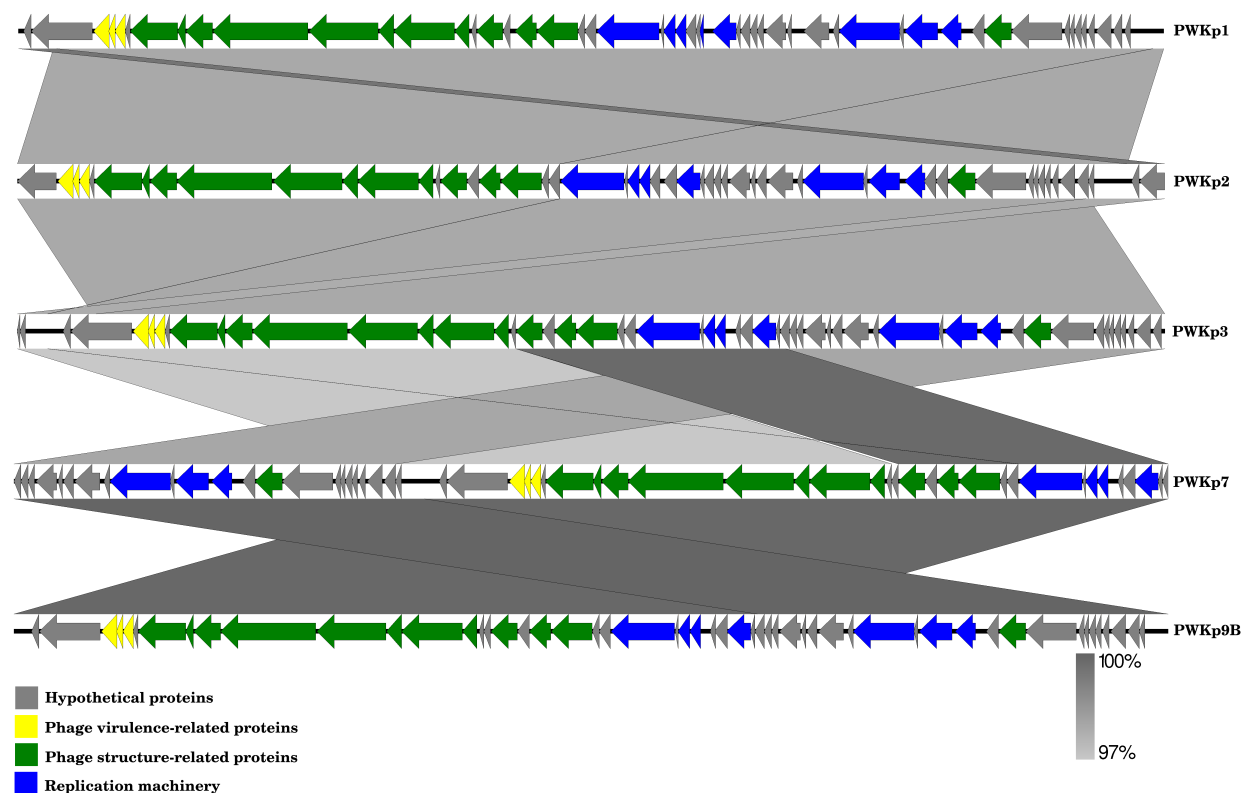

**Figure S2.** Genetic structure and collinear analysis of viruses belonged to *Autographiviridae* family. Arrows, transcription direction of genes and ORFs. Genes were grouped according to their predictive functions, indicated by colour.

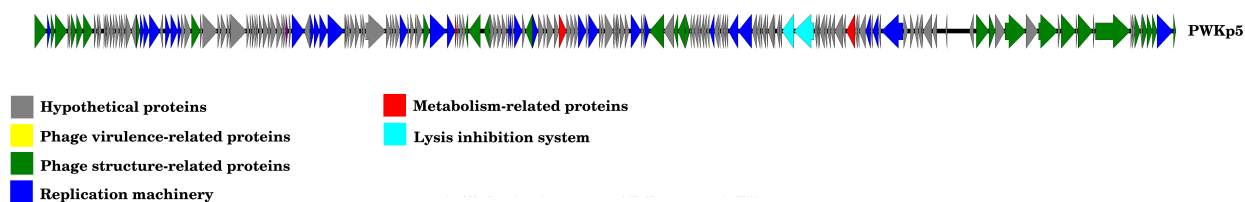

**Figure S3.** Genetic structure of PWKp5, a virus belonging to *Ackermannviridae* family. Arrows, transcriptional direction of genes and ORFs. Genes were grouped according to their predictive functions, indicated by colour.

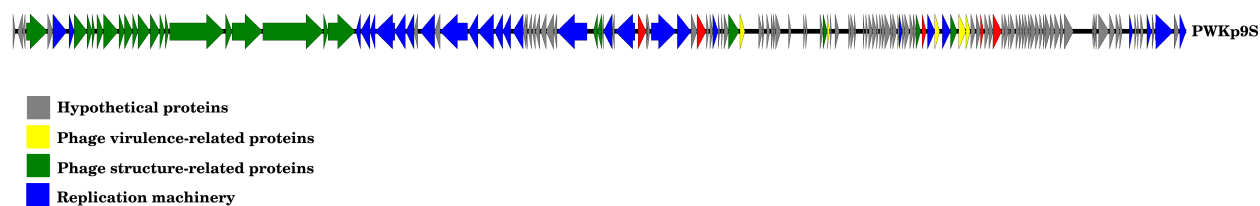

**Figure S4.** Genetic structure of PWKp9S, a virus belonging to *Demerecviridae* family. Arrows, transcription direction of genes and ORFs. Genes were grouped according to their predictive functions, indicated by colour.



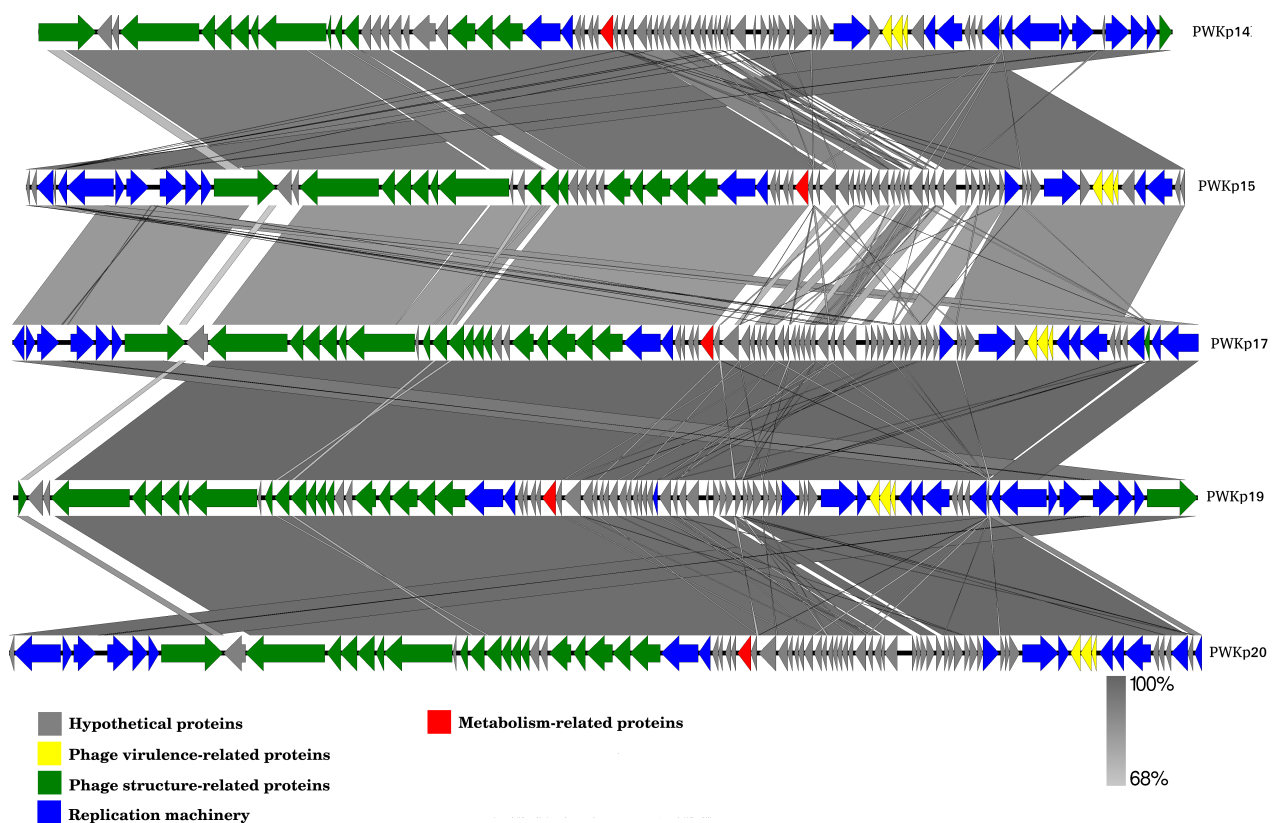

**Figure S5.** Genetic structure and collinear analysis of viruses belonged to *Drexlerviridae* family. Arrows, transcription direction of genes and ORFs. Genes were grouped according to their predictive functions, indicated by colour.

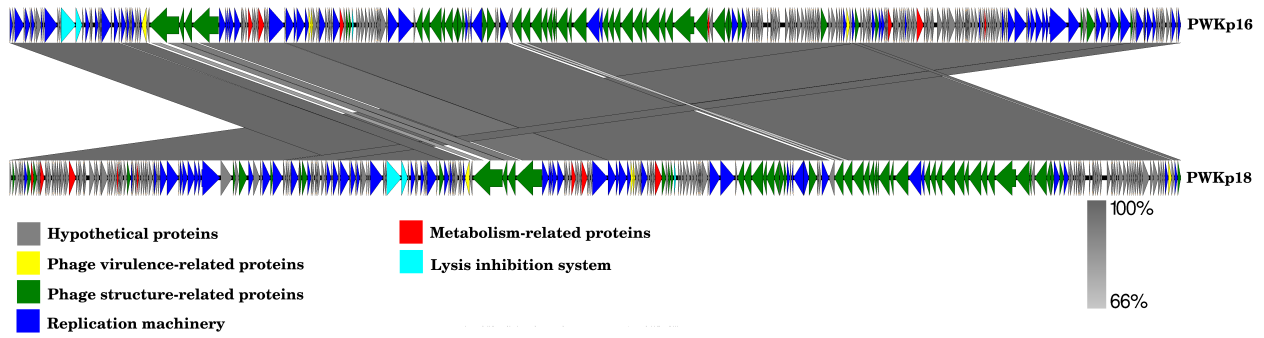

**Figure S6.** Genetic structure and collinear analysis of viruses belonged to *Myoviridae* family. Arrows, transcription direction of genes and ORFs. Genes were grouped according to their predictive functions, indicated by colour.

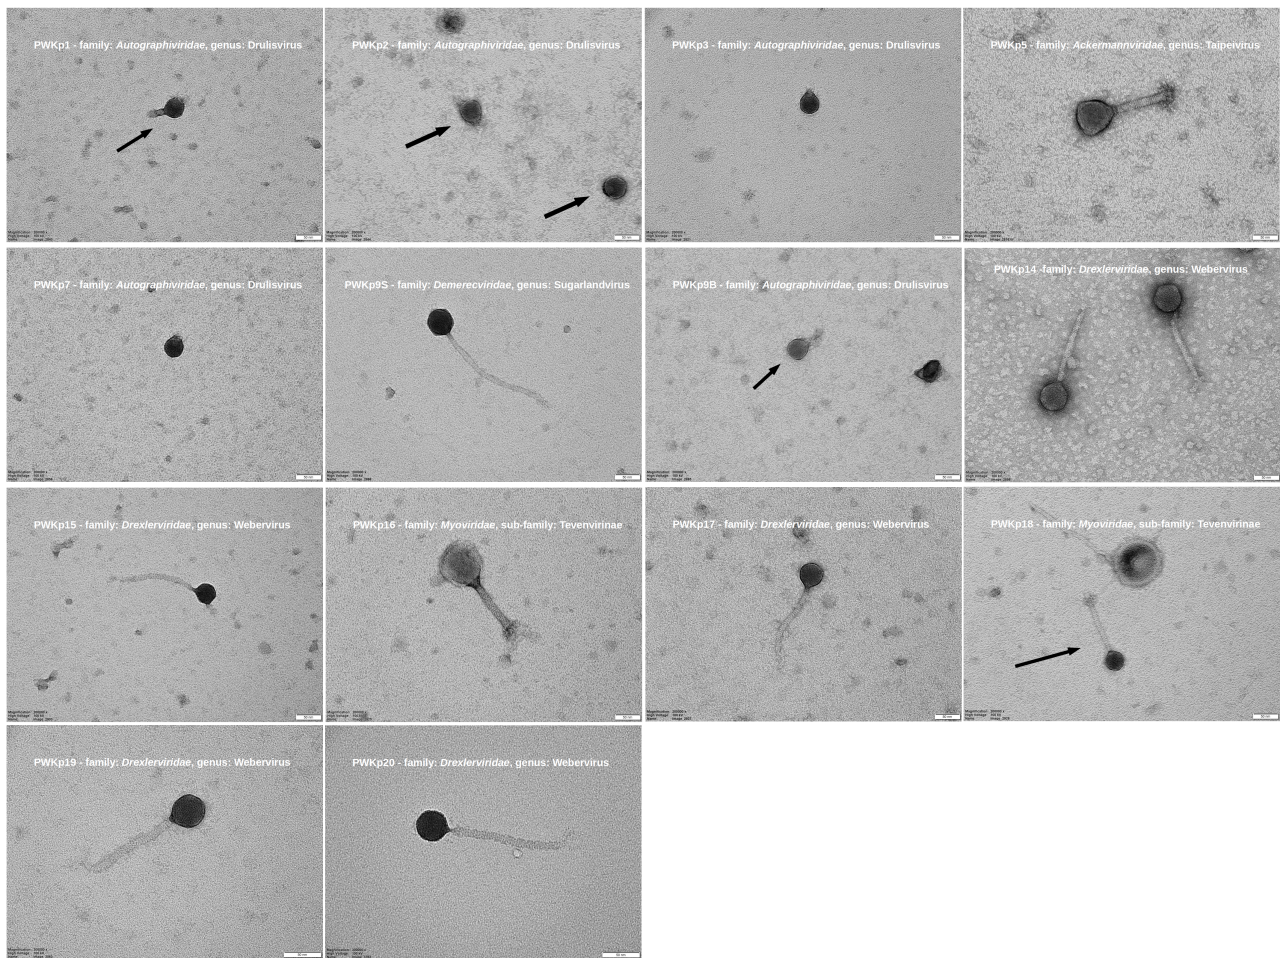

**Figure S7.** Electron microscope pictures from the bacteriophages isolated and characterised in this study. Black arrows indicate the location of some phages.

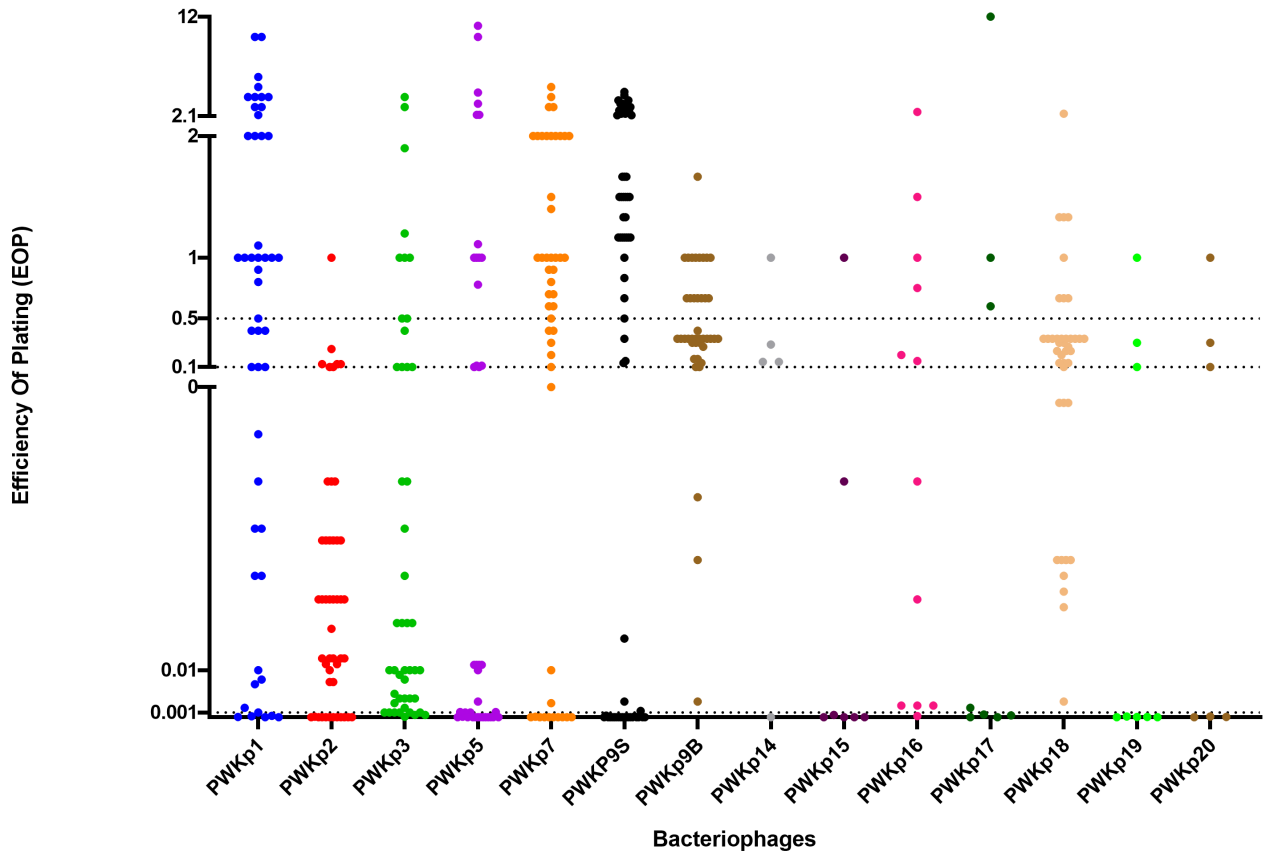

**Figure S8.** Distribution of Efficiency of Plating (EOP) values obtained for the fourteen phages against their respective susceptible *K. pneumoniae* ST16 isolates. Each EOP value was estimated by the ratio between the number of plaques obtained in each tested *K. pneumoniae* isolate relative to the original host. For interpretative purposes,  $EOP \geq 0.5$  indicated high productive infection,  $0.1 \leq EOP < 0.5$  indicated moderate productive infection,  $0.001 < EOP < 0.1$  indicated low productive infection, and  $EOP \leq 0.001$  inefficient infection<sup>60</sup>.

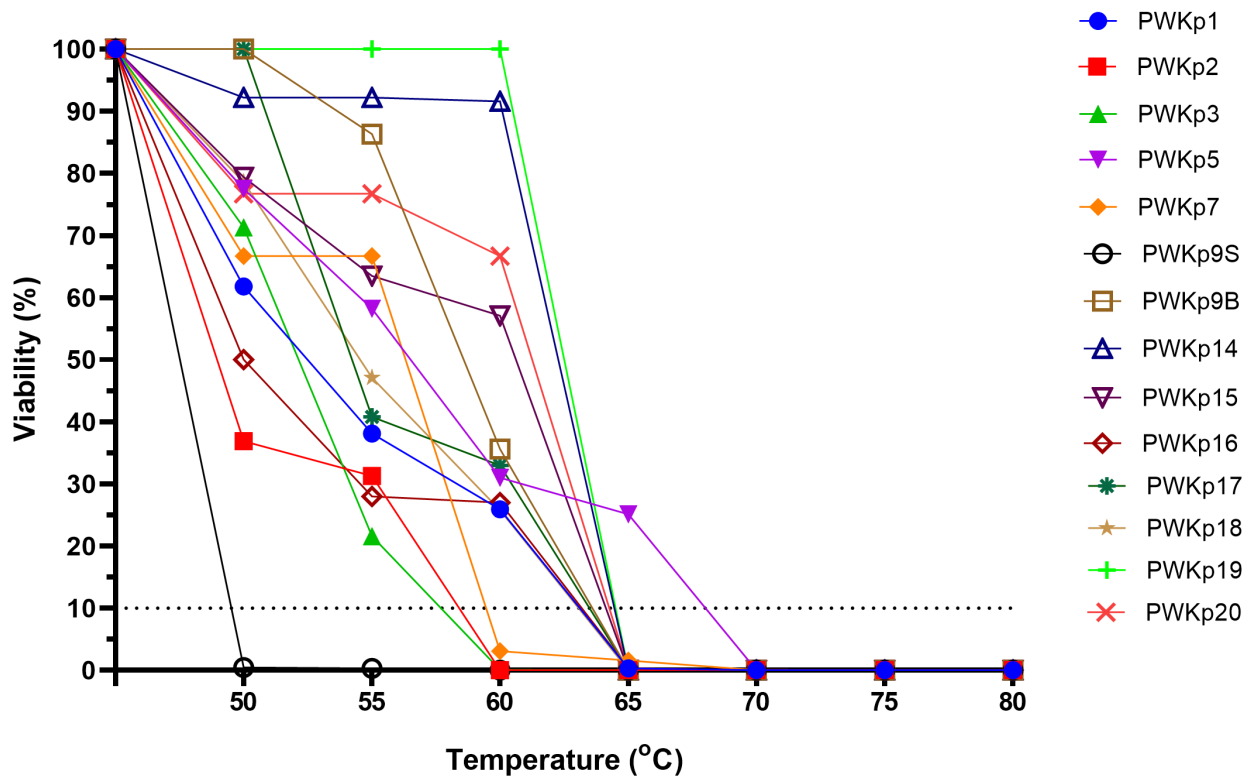

**Figure S9.** Temperature susceptibility of *Klebsiella* phages over one-hour incubation at different temperatures. The plotted values represent a median of three independent experiments. We stipulated 10% viability as a critical point as this would mean an one logarithm (1 log) reduction in the bacteriophage concentration.

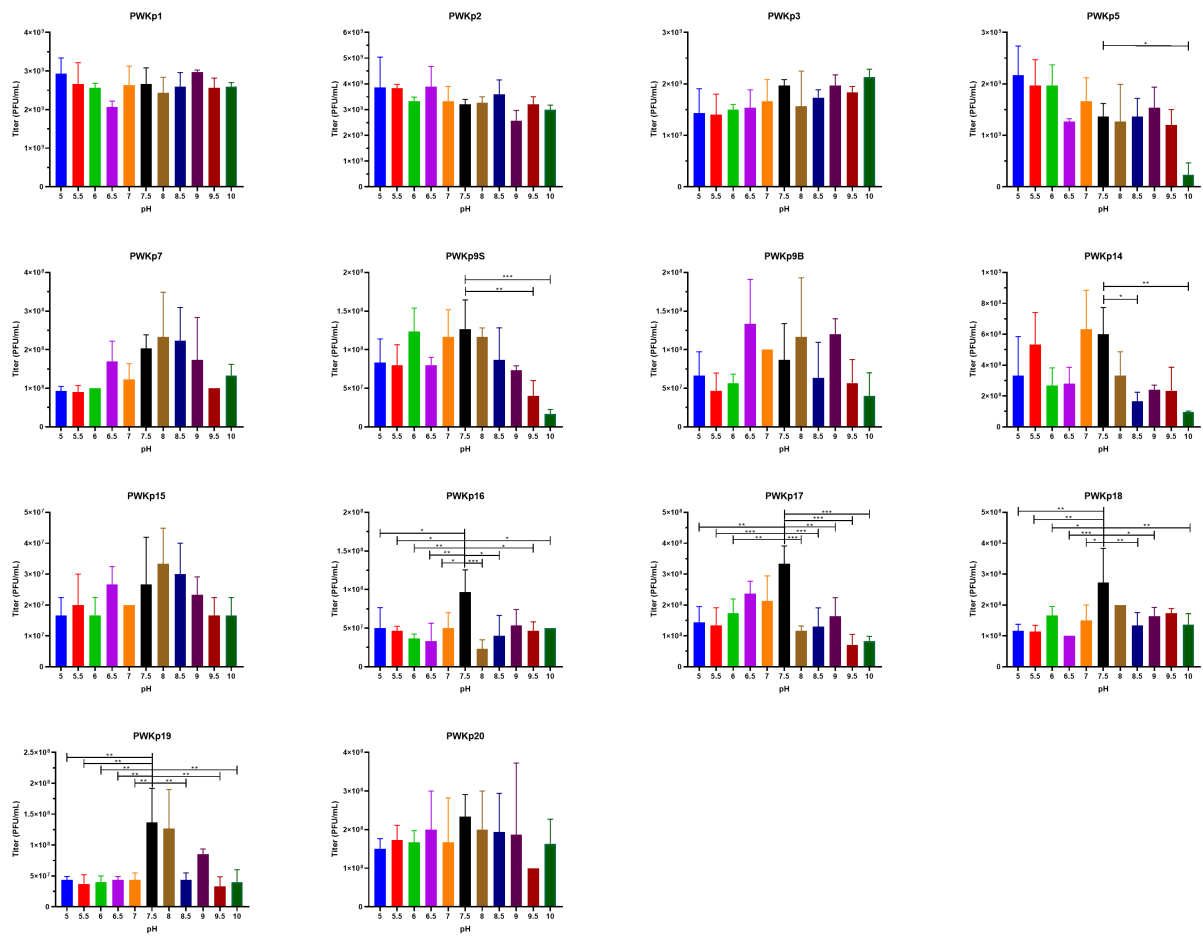

**Figure S10.** Bar charts demonstrating the pH susceptibility of the studied *Klebsiella* phages over one-hour incubation at different SM Buffer pHs. Error bars represent the SD (n=3). One-way ANOVA tests were used to evaluate possible statistical difference among the different tested pHs followed by Dunnett's multiple comparisons tests.\* indicates  $0.01 < p \text{ value} < 0.05$ , \*\* indicates  $0.001 < p \text{ value} < 0.01$ , \*\*\* indicates  $0.0001 < p \text{ value} < 0.001$ .

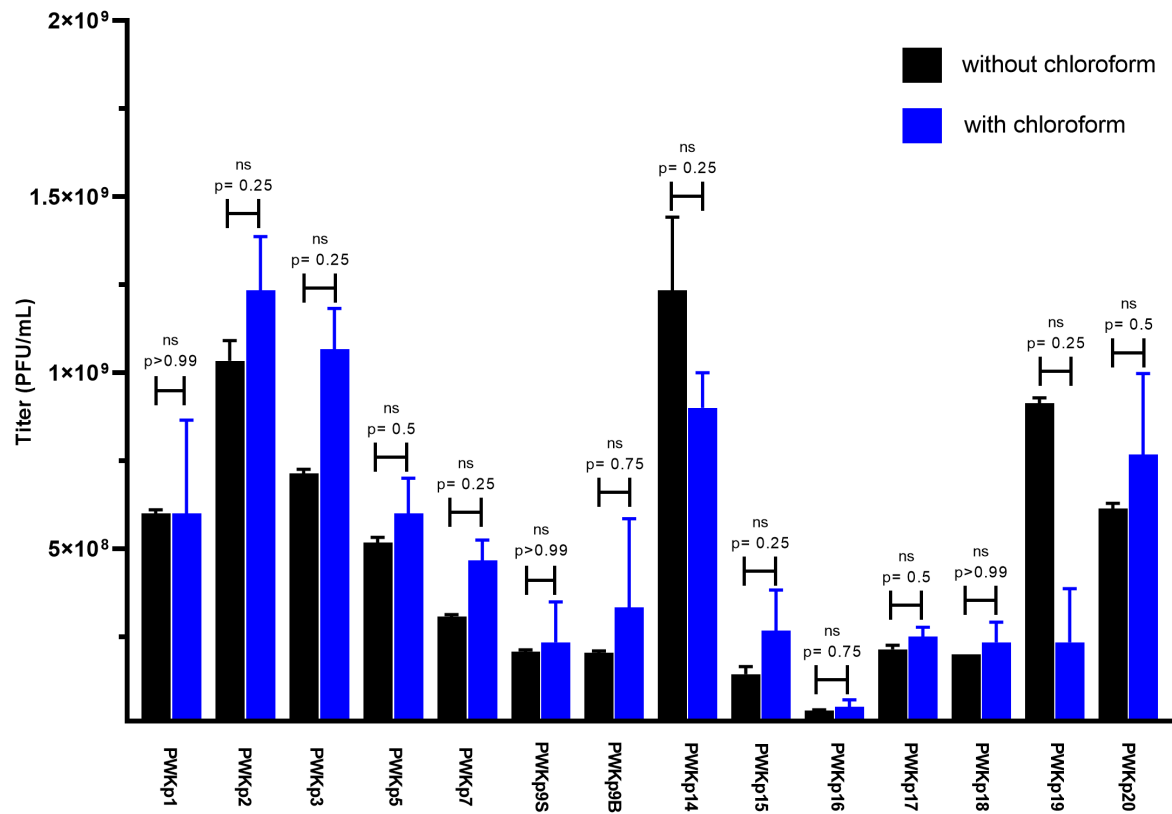

**Figure S11.** Bar charts demonstrating the chloroform susceptibility of the studied *Klebsiella* phages over one-hour incubation. Error bars represent the SD (n=3). Two-tailed t-test (Wilcoxon matched-pairs signed rank test) was used to evaluate possible statistical difference between the presence/absence of chloroform. ns, not significant.

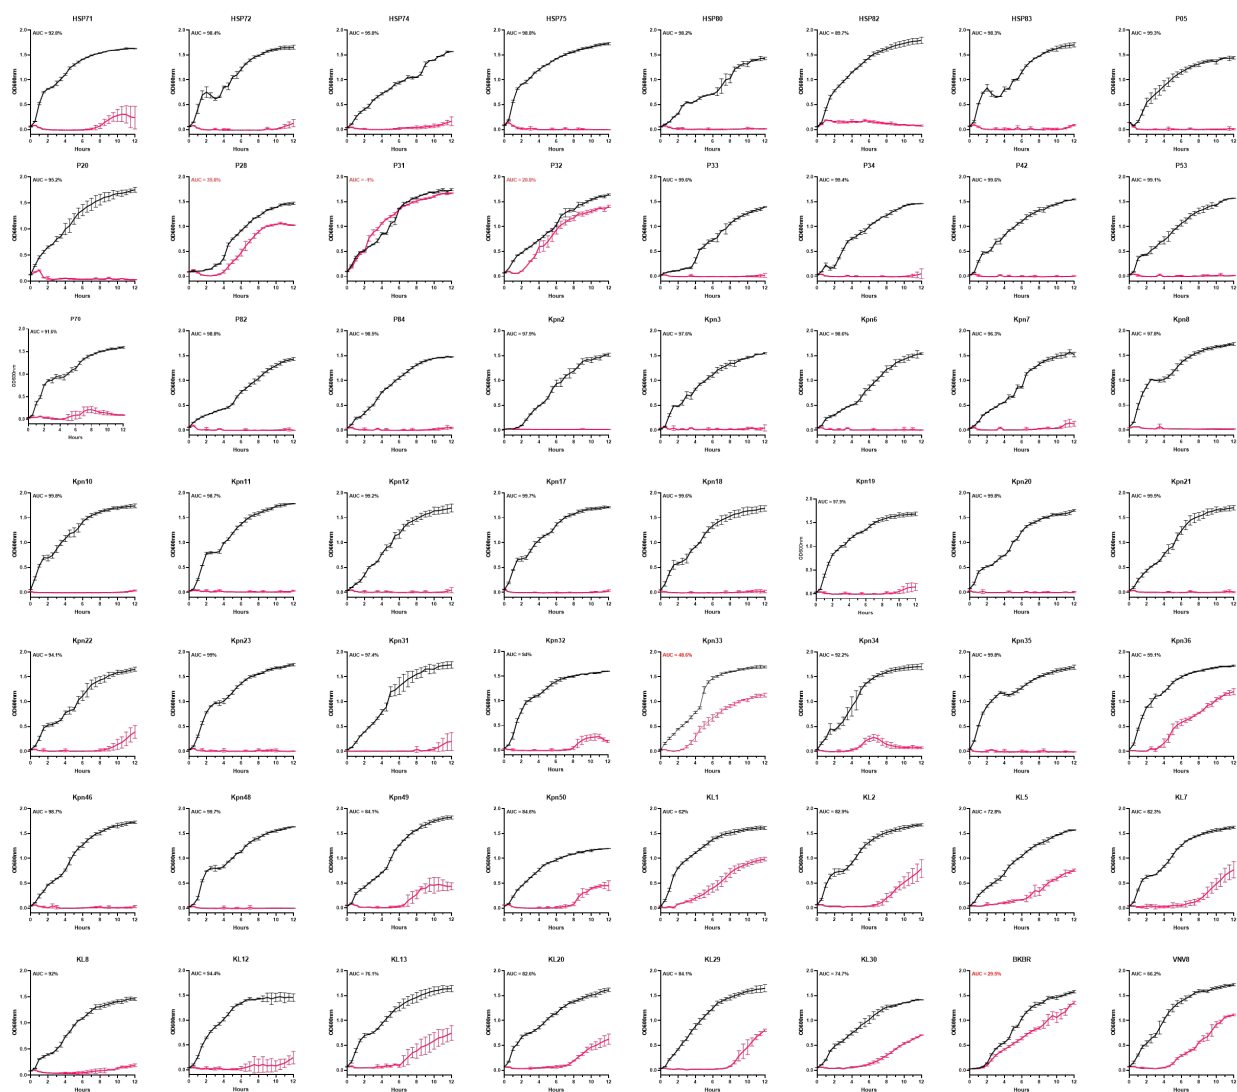

**Figure S12.** Broth inhibition assays performed in the presence of Katrice-16 against our *Klebsiella pneumoniae* ST16 collection (n=56). Black lines represent each bacteria's growth curve without bacteriophage and the pink lines in the presence of Katrice-16. We started the experiment using  $10^7$  CFU/mL of each bacterial isolate and  $10^8$  PFU/mL of our phage cocktail, resulting in a Multiplicity of Infection (MOI) = 10. The area under the curve was calculated using GraphPrism version 8.4.3.



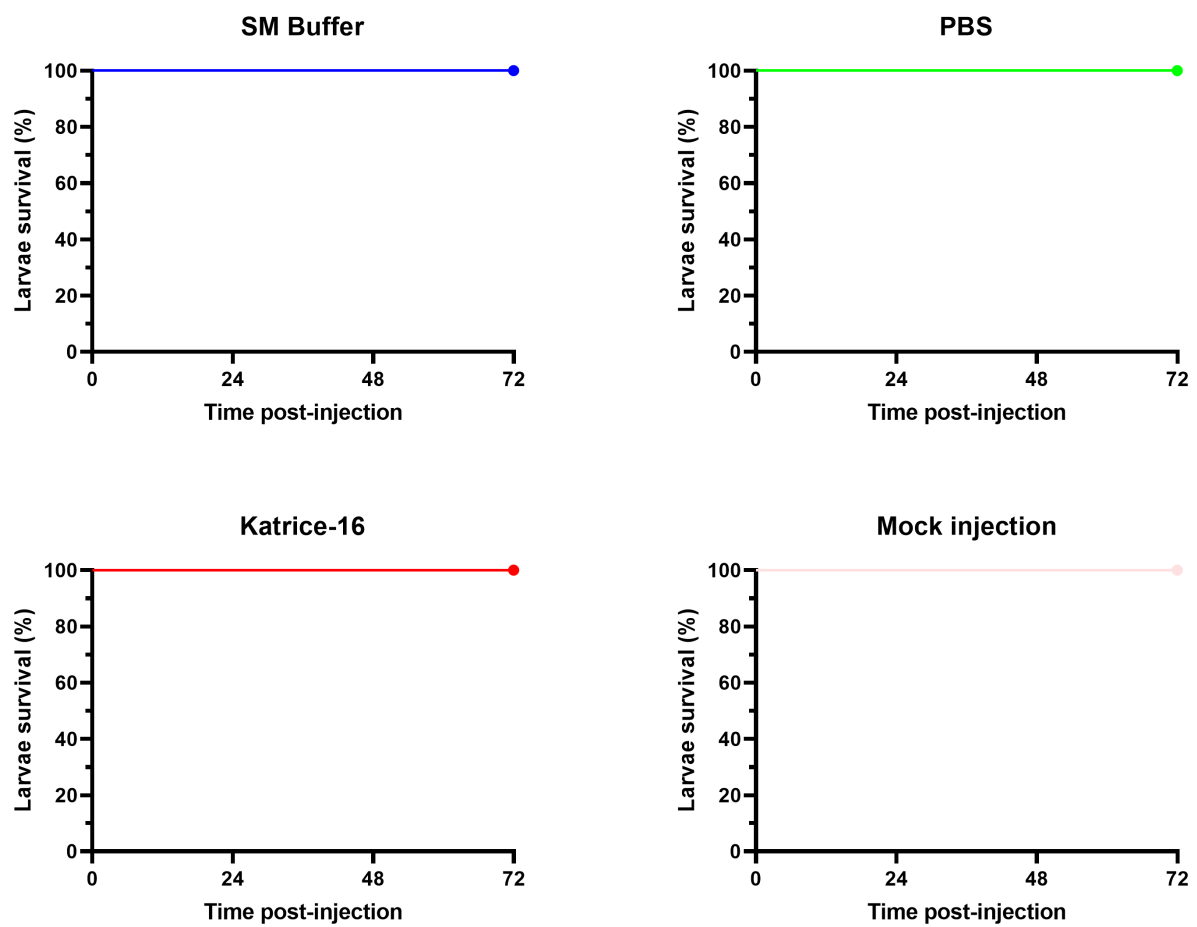

**Figure S13.** Survival curves of the controls used in the *Galleria mellonella* assays.
