# Supplementary material for: Lytic Bacteriophages against Mutidrug-Resistant Klebsiella pneumoniae: Development of an Effective Phage-based Approach to Combat Multidrug Resistance
Source: Research Square preprint supplement (doi:10.21203/rs.3.rs-850585/v1), 2021-09-07
Supplement: Supplementary file 1 [file 91c561fa7f94082f984056b3.xlsx]

## Sheet: Non-ST16 Kpn
Bacteria	ST	KL-type	PWKp1	PWKp2	PWKp3	PWKp5	PWKp7	PWKp9S	PWKp9B	PWKp14	PWKp15	PWKp16	PWKp17	PWKp18	PWKp19	PWKp20	PWKp21
HSP60	11	KL64	N	N	N	N	N	N	N	N	N	N	N	Y (RT)	N	N	N
HSP29	11	KL64	N	N	N	N	N	N	N	N	Y (RT, 37)	N	Y (RT)	N	N	N	N
HSP27	11		N	N	N	N	N	N	N	N	N	N	N	N	N	N	N
HSP25	11		N	N	N	N	N	N	N	N	N	N	N	N	N	N	N
HSP21	11	KL15	N	N	N	N	N	N	N	N	N	N	N	N	N	N	N
HSP10	11	KL64	N	N	N	N	N	N	N	N	N	N	N	Y (RT)	N	N	N
P17	11		N	N	N	N	N	N	N	N	N	N	N	N	N	N	N
P14	11		N	N	N	N	N	N	N	N	N	N	N	N	N	N	N
P12	11	KL64	N	N	N	N	N	N	N	N	N	N	N	N	N	N	N
P10	11	KL64	N	N	N	N	N	N	N	N	N	N	N	N	N	N	N
P09	11		N	N	N	N	N	N	N	N	N	N	N	N	N	N	N
P06	11		N	N	N	N	N	N	N	N	N	N	N	N	N	N	N
HSP85	11		N	N	N	N	N	N	N	N	N	N	N	N	N	N	N
HSP81	11		N	N	N	N	N	N	N	N	N	N	N	N	N	N	N
HSP76	11		N	N	N	N	N	N	N	N	Y (RT, 37)	N	N	N	N	N	N
HSP73	11	KL64	N	N	N	N	N	N	N	N	N	N	N	N	N	N	N
HSP68	11		N	N	N	N	N	N	N	N	N	N	N	N	N	N	N
HSP64	11	KL64	N	N	N	N	N	Y (RT, 37)	N	N	N	N	N	Y (RT)	N	N	N
HSP63	11		N	N	N	N	N	N	N	N	N	N	N	N	N	N	N
HSP62	11		N	N	N	N	N	N	N	N	N	N	N	N	N	N	N
P22	11	KL64	N	N	N	N	N	N	N	N	N	N	N	N	N	N	N
P19	11	KL64	N	N	N	N	N	N	N	N	N	N	N	N	N	N	N
P30	11	KL64	N	N	N	N	N	N	N	N	N	N	N	N	N	N	N
P26	11	KL64	N	N	N	N	N	N	N	N	N	N	N	Y (RT)	N	N	N
P24	11		N	N	N	N	N	N	N	N	N	N	N	N	N	N	N
P25	11		N	N	N	N	N	N	N	N	N	N	N	N	N	N	N
P23	11	KL64	N	N	N	N	N	N	N	N	Y (RT)	N	N	N	N	N	N
PS11	11	KL24	N	N	N	N	N	N	N	N	N	N	N	N	N	N	N
P16	15	KL112	N	N	N	N	N	N	N	N	N	N	N	N	N	N	N
P02	15	KL112	N	N	N	N	N	N	N	N	N	N	N	N	N	N	N
P21	15	KL112	N	N	N	N	N	N	N	N	N	N	N	N	N	N	N
P35	15	KL112	N	N	N	N	N	N	N	N	N	N	N	N	N	N	N
IS492	15	KL113	N	N	N	N	N	N	N	N	N	N	N	Y (RT)	N	N	N
IS411	15	KL24	N	N	N	N	N	N	N	N	N	N	N	N	N	N	N
IS405	15	KL24	N	N	N	N	N	N	N	N	N	N	N	N	N	N	N
IS299	17	KL107	N	N	N	N	N	N	N	N	N	N	N	Y (RT)	Y (RT)	N	N
IS299	29	KL19	N	N	N	N	N	N	N	N	N	N	N	Y (RT)	N	N	N
IS1133	29	KL19	N	N	N	N	N	Y (RT, 37)	Y (RT, 37)	N	N	N	N	N	N	N	N
W4W	35	KL110	N	N	N	N	N	Y (RT)	N	N	Y (RT)	N	N	Y (RT)	N	N	N
HSP18	101	KL17	N	N	N	N	N	Y (RT, 37)	N	N	N	N	N	N	N	N	N
P04	101	KL17	N	N	N	N	N	Y (RT, 37)	N	N	N	N	N	N	N	N	N
HSP65	101	KL17	N	N	N	N	N	Y (RT)	N	N	N	N	N	N	N	N	N
P08	101	KL17	N	N	N	N	N	Y (RT, 37)	N	N	N	N	N	N	N	N	N
IS1161	147	KL149	N	N	N	N	N	N	N	N	N	N	N	N	N	N	N
PP331	147	KL64	N	N	N	N	N	N	N	N	N	N	N	N	N	N	N
W78623	185	KL130	N	N	N	N	N	Y (RT, 37)	N	N	N	N	N	N	N	N	N
PP45	231	KL51	N	N	N	N	N	N	N	N	N	N	N	N	N	N	N
IS257	231	KL51	N	N	N	N	N	N	N	N	N	N	N	N	N	N	N
PP435G	231	KL51	N	N	N	Y (RT, 37)	N	Y (RT, 37)	N	N	N	N	N	N	N	N	N
PP309G	231	KL51	N	N	N	Y (RT, 37)	N	Y (RT, 37)	Y (RT, 37)	N	N	N	N	N	N	N	N
PP308G	231	KL51	N	N	N	Y (37)	N	Y (37)	Y (RT, 37)	N	N	N	N	N	N	N	N
PP384G	231	KL51	Y (RT)	N	Y (RT)	Y (RT, 37)	N	Y (RT, 37)	Y (RT, 37)	N	N	N	N	N	N	N	N
BCBR 373-1	231	KL51	N	N	N	N	N	N	Y (RT, 37)	N	N	N	N	N	N	N	N
VN2054	231	KL51	N	N	N	N	N	N	N	N	N	N	N	Y (RT)	N	N	N
HSP31	258	KL107	N	N	N	N	N	Y (RT, 37)	N	N	N	N	N	N	N	N	N
HSP22	258	KL107	N	N	N	N	N	N	N	N	N	N	N	N	N	N	N
HSP16	258	KL107	N	N	N	N	N	Y (RT)	N	N	N	N	N	N	N	N	N
HSP08	258	KL107	N	N	N	N	N	N	N	N	N	N	N	N	N	N	N
HSP01	258	KL107	N	N	N	N	N	Y (RT)	N	N	N	N	N	N	N	N	N
HSP07	258	KL107	N	N	N	N	N	Y (RT)	N	N	N	N	N	N	N	N	N
P15	258	KL107	N	N	N	N	N	Y (37)	N	N	Y (RT, 37)	N	N	Y (RT)	N	Y (37)	N
HSP87	258	KL107	N	N	N	N	N	Y (37)	N	N	Y (RT, 37)	N	N	Y (RT)	N	Y (RT, 37)	N
HSP86	258	KL107	N	N	N	N	N	Y (RT)	N	N	N	N	N	N	N	N	N
HSP78	258	KL107	N	N	N	N	N	Y (RT)	N	N	N	N	N	N	N	N	N
HSP61	258	KL107	N	N	N	N	N	N	N	N	Y (RT, 37)	N	N	N	N	Y (RT)	N
P27	258	KL107	N	N	N	N	N	Y (RT, 37)	N	N	N	N	N	N	N	N	N
P47	258	KL107	N	N	N	N	N	N	N	N	N	N	N	N	N	N	N
P37	258	KL107	N	N	N	N	N	Y (RT, 37)	N	N	Y (RT)	N	N	Y (RT)	N	N	N
P48	258	KL107	N	N	N	N	N	Y (RT, 37)	N	N	N	N	N	N	N	N	N
P55	258	KL107	N	N	N	N	N	N	N	N	Y (RT, 37)	N	N	Y (RT)	N	N	N
P38	258	KL107	N	N	N	N	N	Y (RT, 37)	N	N	N	N	N	Y (RT)	N	N	N
P39	258	KL107	N	N	N	N	N	Y (RT)	N	N	N	N	N	N	N	N	N
P43	258	KL107	N	N	N	N	N	Y (RT, 37)	N	N	Y (RT)	N	N	Y (RT)	N	N	N
P46	258	KL107	N	N	N	N	N	Y (RT)	N	N	N	N	N	N	N	N	N
P54	258	KL107	N	N	N	N	N	N	N	N	Y (RT)	N	N	N	N	N	N
IW473	307	KL102	N	N	N	N	N	N	N	N	N	N	N	N	N	N	N
IS69	323	KL21	N	N	N	N	N	N	N	N	N	N	N	N	N	N	N
IS262	323	KL21	N	N	N	N	N	Y (RT, 37)	N	N	N	N	N	N	N	N	N
IS1072	323	KL21	N	N	N	N	N	N	N	N	N	N	N	N	N	N	N
PP324	394	KL3	N	N	N	N	N	N	N	N	Y (RT)	N	N	N	N	Y (RT)	N
P56	437	KL36	N	N	N	N	N	N	N	N	N	N	N	N	N	N	N
P85	437	KL36	N	N	N	N	N	N	N	N	N	N	N	Y (RT)	N	N	N
P03	437	KL36	N	N	N	N	N	N	N	N	N	N	N	N	N	N	N
HSP66	437	KL36	N	N	N	N	N	N	N	N	N	N	N	N	N	N	N
HSP67	437	KL36	N	N	N	N	N	N	N	N	N	N	N	N	N	N	N
P07	437	KL36	N	N	N	N	N	N	N	N	N	N	N	N	N	N	N
P11	437	KL36	N	N	N	N	N	N	N	N	N	N	N	N	N	N	N
P13	437	KL36	N	N	N	N	N	N	N	N	N	N	N	Y (RT)	N	N	N
Kpn26	442	KL107	N	N	N	N	N	N	N	N	N	N	N	N	N	N	N
Kpn15	442	KL107	N	N	N	N	N	N	N	N	Y (RT)	N	N	N	N	N	N
Kpn13	442	KL107	N	N	N	N	N	N	N	N	N	N	N	N	N	N	N
Kpn1	442	KL107	N	N	N	N	N	N	N	N	Y (RT)	N	N	N	N	N	N
Kpn25	442	KL107	N	N	N	N	N	N	N	N	N	N	N	N	N	N	N
Kpn5	442	KL107	N	N	N	N	N	N	N	N	Y (RT, 37)	N	N	N	N	N	N
Kpn51	442	KL107	N	N	N	N	N	N	N	N	Y (RT, 37)	N	N	N	N	N	N
Kpn37	442	KL107	N	N	N	N	N	N	N	N	N	N	N	N	N	N	N
Kpn27	442	KL107	N	N	N	N	N	N	N	N	N	N	N	N	N	N	N
Kp13	442	KL107	N	N	N	N	N	Y (RT)	N	N	N	N	N	N	N	N	N
IS649	2108	KL31	N	N	N	N	N	N	N	N	N	N	N	N	N	N	N
PS253	2661	KL59	N	N	N	N	N	N	N	N	N	N	N	N	N	N	N
IS294	2680	KL117	N	N	N	N	N	N	N	N	N	N	N	Y (RT)	N	N	N
W45	3987	KL23*	N	N	N	N	N	Y (RT, 37)	N	N	Y (RT, 37)	N	N	Y (RT)	N	N	N
W22	17*	KL23	N	N	N	N	N	Y (RT)	N	N	Y (RT, 37)	N	N	N	N	N	N
Legends
N – No activity
Y – Activity
RT – room temperature
