# Supplementary material for: Lytic Bacteriophages against Mutidrug-Resistant Klebsiella pneumoniae: Development of an Effective Phage-based Approach to Combat Multidrug Resistance
Source: Research Square preprint supplement (doi:10.21203/rs.3.rs-850585/v1), 2021-09-07
Supplement: Supplementary file 2 [file e6b851d94fd40536eeaddb91.xlsx]

## Sheet: General Features
ID Code	PFGE Pattern	Date of isolation (dd/mm/yyyy)	Country of isolation	Carbapenemase	Source	AMK	GEN	CTX	CAZ	CAZ/AVI	CEP	TZP	ATM	IMP	ETP	MEM	CIP	LEV	FOS	NIT	SXT	TIG	COL
HSP 71	A1	18.06.2016	Brazil	KPC-2	Blood culture
HSP 72	A5	18.06.2016	Brazil	KPC-2	Blood culture
HSP 74	A1	01.11.2016	Brazil	KPC-2	Blood culture
HSP 75	A4	04.11.2016	Brazil	KPC-2	Blood culture
HSP 80	A1	18.11.2016	Brazil	KPC-2	Blood culture
HSP 82	A1	30.11.2016	Brazil	KPC-2	Blood culture
HSP 83	A1	06.11.2016	Brazil	KPC-2	Blood culture
P05	A1	30.09.2015	Brazil	KPC-2	Blood culture
P20	A1	17.08.2015	Brazil	KPC-2	Blood culture
P28	A1	26.02.2015	Brazil	KPC-2	Blood culture
P31	A1	09.08.2014	Brazil	KPC-2	Blood culture
P32	A1	22.09.2014	Brazil	KPC-2	Blood culture
P33	A1	28.08.2014	Brazil	KPC-2	Blood culture
P34	A1	14.07.2014	Brazil	KPC-2	Blood culture
P42	A2	07.12.2014	Brazil	KPC-2	Blood culture
P53	A1	12.07.2015	Brazil	KPC-2	Blood culture
P70	A1	14.04.2015	Brazil	KPC-2	Blood culture
P82	A3	17.04.2016	Brazil	KPC-2	Blood culture
P84	A1	15.07.2015	Brazil	KPC-2	Blood culture
Kpn2	A7	16.03.2018	Brazil	KPC-2	Tracheal aspirate
Kpn3	A8	23.04.2018	Brazil	KPC-2	Other
Kpn6	A1	26.08.2017	Brazil	KPC-2	Blood culture
Kpn7	B1	26.05.2017	Brazil	-	Blood culture
Kpn8	A1	02.09.2017	Brazil	KPC-2	Catheter culture
Kpn10	A7	27.02.2018	Brazil	KPC-2	Catheter culture
Kpn11	B2	09.08.2018	Brazil	-	Blood culture
Kpn12	A1	31.08.2017	Brazil	KPC-2	Blood culture
Kpn17	B2	13.12.2018	Brazil	-	Blood culture
Kpn18	A2	26.08.2018	Brazil	KPC-2	Blood culture
Kpn19	A1	07.08.2018	Brazil	KPC-2	Tracheal aspirate
Kpn20	A1	11.11.2017	Brazil	KPC-2	Blood culture
Kpn21	A1	12.03.2018	Brazil	KPC-2	Surgical wound
Kpn22	A1	22.04.2018	Brazil	KPC-2	Blood culture
Kpn23	A1	27.04.2018	Brazil	KPC-2	Tracheal aspirate
Kpn31	A2	28.02.2018	Brazil	KPC-2	Catheter culture
Kpn32	A5	19.06.2018	Brazil	KPC-2	Blood culture
Kpn33	A1	26.03.2018	Brazil	KPC-2	Blood culture
Kpn34	A1	23.09.2018	Brazil	KPC-2	Tracheal aspirate
Kpn35	A4	13.03.2018	Brazil	KPC-2	Catheter culture
Kpn36	A5	16.03.2018	Brazil	KPC-2	Tracheal aspirate
Kpn46	A1	17.04.2018	Brazil	KPC-2	Blood culture
Kpn48	A1	25.11.2017	Brazil	KPC-2	Blood culture
Kpn49	A1	31.01.2018	Brazil	KPC-2	Blood culture
Kpn50	A3	07.08.2018	Brazil	KPC-2	Tracheal aspirate
KL1	A5	05.09.2016	Italy	NDM-1	Blood culture
KL29	A5	21.09.2016	Italy	OXA-232	Rectal Swab
KL30	A5	01.10.2016	Italy	OXA-232	Skin
KL2	A5	25.11.2016	Italy	NDM-1	Urine
KL5	A5	18.01.2017	Italy	NDM-1	Urine
KL7	A5	24.02.2017	Italy	NDM-1 + OXA-232	Blood culture
KL8	A5	07.03.2017	Italy	NDM-1 + OXA-232	Urine
KL20	A5	21.03.2017	Italy	NDM-1	Rectal Swab
KL12	A5	25.03.2017	Italy	NDM-1 + OXA-232	Urine
KL13	A5	27.03.2017	Italy	NDM-1	Blood culture
BKBR	A6		Bangladesh	NDM-1	Rectal Swab
VNV8	A2		Vietnã	NDM-1	Rectal Swab
*Susceptibily profile was interpreted according to EUCAST 2021 guidelines
	Susceptible
	Resistant
